# Supplementary material for: Amorphous mesoporous nickel phosphate/reduced graphene oxide with superior performance for electrochemical capacitors
Source: Royal Society of Chemistry journal article supplement (doi:10.1039/c8dt02304b), 2018-01-01
Supplement: c8dt02304b1.pdf [file c8dt02304b1.pdf]

## Supporting Information

### Amorphous mesoporous nickel phosphate/reduced graphene oxide with superior performance for electrochemical capacitors

Jingjing Yuan<sup>1,2</sup>, Xiaoke Zheng<sup>2</sup>, Dachuan Yao<sup>2</sup>, Ling Jiang<sup>2</sup>, Ya Li<sup>2</sup>, Jianfei Che<sup>1\*</sup>, Guangyu He<sup>2</sup>, Haiqun

Chen<sup>2\*</sup>

(<sup>1</sup>School of Chemical Engineering, Nanjing University of Science and Technology, Nanjing, Jiangsu 210094, China

<sup>2</sup>Advanced Catalysis and Green Manufacturing Collaborative Innovation Center, Key Laboratory of Advanced Catalytic Materials and Technology, Changzhou University, Changzhou, Jiangsu 213164, China)

The XPS spectra of O 1s is presented in Fig. S1, which is a typical peak at 531.4 eV.

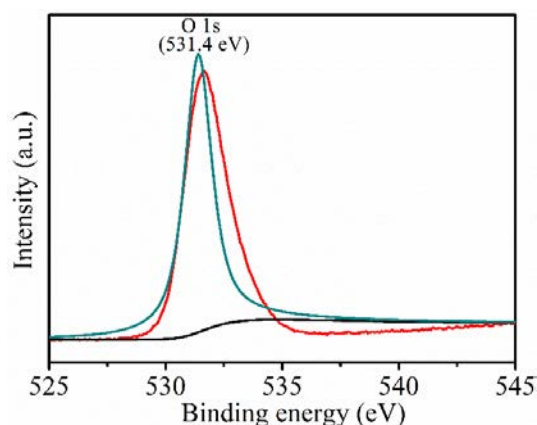

Figure S1. XPS spectra of element O in  $\text{Ni}_3(\text{PO}_4)_2/\text{rGO}-300$ .

The FTIR spectra of GO,  $\text{Ni}_3(\text{PO}_4)_2-300$  and  $\text{Ni}_3(\text{PO}_4)_2/\text{rGO}-300$  is presented in Fig. S2.

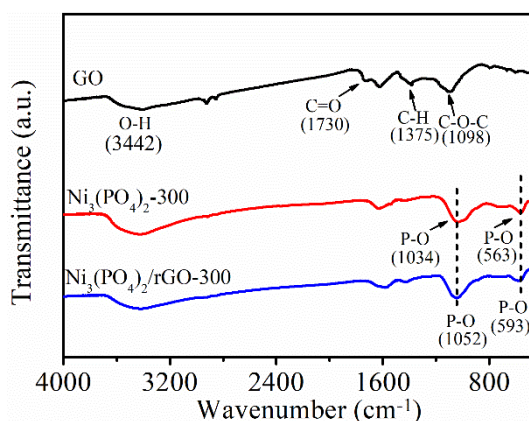

Figure S2. FTIR spectra of GO,  $\text{Ni}_3(\text{PO}_4)_2-300$  and  $\text{Ni}_3(\text{PO}_4)_2/\text{rGO}-300$ .

The TGA curve of  $\text{Ni}_3(\text{PO}_4)_2/\text{rGO}-300$  and  $\text{Ni}_3(\text{PO}_4)_2-300$  is shown in Fig. S3.

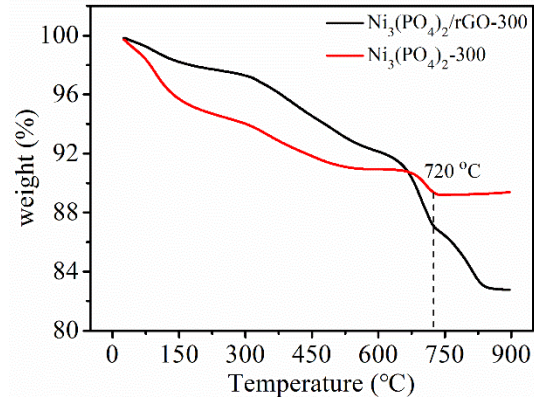

Figure S3. TGA curve of  $\text{Ni}_3(\text{PO}_4)_2/\text{rGO-300}$  and  $\text{Ni}_3(\text{PO}_4)_2\text{-300}$  in Nitrogen.

The BET isotherms of  $\text{Ni}_3(\text{PO}_4)_2/\text{rGO-900}$  is shown in Fig. S4 and there is almost no specific surface area, indicating significant decrease of the surface area in the condition.

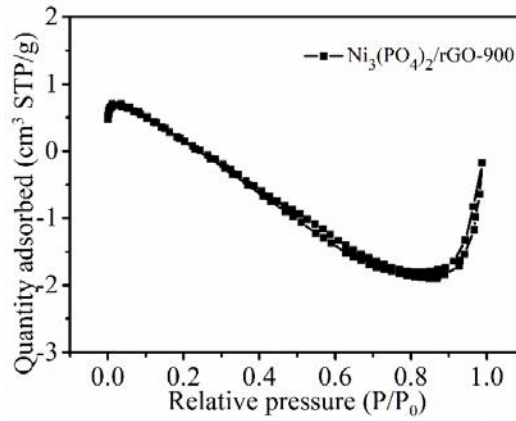

Figure S4.  $\text{N}_2$  adsorption-desorption isotherm of  $\text{Ni}_3(\text{PO}_4)_2/\text{rGO-900}$ .

Fig. S5 shows the Nyquist plots of  $\text{Ni}_3(\text{PO}_4)_2/\text{rGO-300}/\text{AC}$ .

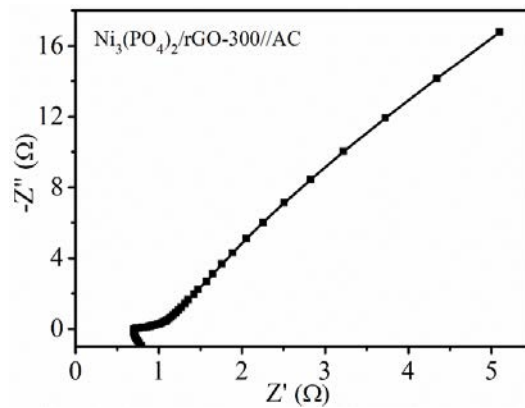

Figure S5. Nyquist plots of  $\text{Ni}_3(\text{PO}_4)_2/\text{rGO-300}/\text{AC}$
